# Supplementary material
Source: MDPI journal article supplement (https://www.mdpi.com/2624-8549/4/1/16)
Supplement: s1 [file s1]

# Supporting Information:

## Solvation Effects on the Thermal Helix Inversion of Molecular Motors from QM/MM Calculations

Jin Wen,<sup>\*,†,‡</sup> Meifang Zhu,<sup>†</sup> and Leticia González<sup>‡</sup>

<sup>†</sup>*State Key Laboratory for Modification of Chemical Fibers and Polymer Materials, College  
of Materials Science and Engineering, Donghua University, Shanghai 201620, China*

<sup>‡</sup>*Institute of Theoretical Chemistry, Faculty of Chemistry, University of Vienna,  
Währinger Str. 17, 1090 Vienna, Austria*

E-mail: jinwen@dhu.edu.cn

## Contents

Cartesian coordinates and dipole moments of the motors 1-5 in the  $S_0$  state  
in gas phase. S2

# Cartesian coordinates and dipole moments of the motors 1-5 in the S<sub>0</sub> state in gas phase.

**Table S1:** Coordinates of optimized **1a** minimum in the S<sub>0</sub> state at B3LYP/cc-pVDZ level.

|   |           |           |          |
|---|-----------|-----------|----------|
| C | -2.309526 | 4.175942  | 1.85388  |
| C | -1.298093 | 4.214603  | 0.88896  |
| C | -0.838611 | 3.016062  | 0.33952  |
| C | -1.394517 | 1.767907  | 0.73099  |
| C | -2.372819 | 1.743111  | 1.73511  |
| C | -2.832216 | 2.946019  | 2.28107  |
| C | 0.236509  | 2.758058  | -0.61817 |
| C | 0.379692  | 1.351449  | -0.76059 |
| C | -0.646956 | 0.676255  | 0.06827  |
| C | 1.286976  | 0.848727  | -1.70293 |
| C | 1.022912  | 3.642279  | -1.35952 |
| C | 1.954227  | 3.124995  | -2.26521 |
| C | 2.074206  | 1.738224  | -2.44066 |
| H | 2.790543  | 1.344337  | -3.16514 |
| H | 1.384441  | -0.223429 | -1.86684 |
| H | 0.900861  | 4.721745  | -1.24392 |
| H | 2.579488  | 3.802965  | -2.85051 |
| H | -0.861602 | 5.167511  | 0.58092  |
| H | -2.680917 | 5.105203  | 2.29155  |
| H | -3.602444 | 2.924919  | 3.05534  |
| H | -2.771149 | 0.798675  | 2.10673  |
| C | -0.896456 | -0.675708 | 0.16607  |
| C | -2.294759 | -1.293743 | 0.34706  |
| C | 0.049673  | -1.786571 | 0.00886  |
| C | -2.130602 | -2.728591 | -0.23612 |
| C | -0.650460 | -2.969404 | -0.24238 |
| C | -3.445328 | -0.562935 | -0.35560 |
| H | -2.514927 | -1.388002 | 1.42736  |
| C | 1.472210  | -1.844260 | 0.23652  |
| C | 0.006618  | -4.197187 | -0.45438 |
| C | 1.382991  | -4.246243 | -0.37564 |
| C | 2.138564  | -3.096601 | -0.00515 |
| H | -0.572542 | -5.095613 | -0.68029 |
| H | 1.913824  | -5.184753 | -0.55484 |
| H | -2.531810 | -2.757577 | -1.26515 |
| H | -2.676604 | -3.493712 | 0.33807  |
| H | -3.211347 | -0.433212 | -1.42477 |
| H | -3.652480 | 0.429383  | 0.06005  |
| H | -4.367459 | -1.162364 | -0.27853 |
| C | 3.546411  | -3.184015 | 0.18051  |
| C | 4.271306  | -2.103508 | 0.63662  |
| C | 3.605197  | -0.894579 | 0.94815  |
| C | 2.243685  | -0.768936 | 0.75256  |
| H | 4.042298  | -4.135893 | -0.02665 |
| H | 5.350970  | -2.184871 | 0.78017  |
| H | 4.170888  | -0.051837 | 1.35140  |
| H | 1.749135  | 0.165177  | 1.00723  |

**Table S2:** Coordinates of optimized **1b** minimum in the  $S_0$  state at B3LYP/cc-pVDZ level.

|   |           |           |          |
|---|-----------|-----------|----------|
| C | -2.912728 | 4.383407  | 0.32485  |
| C | -1.514907 | 4.380350  | 0.35943  |
| C | -0.839991 | 3.159646  | 0.40082  |
| C | -1.541646 | 1.923432  | 0.40783  |
| C | -2.942664 | 1.945620  | 0.35330  |
| C | -3.616771 | 3.172342  | 0.32043  |
| C | 0.594785  | 2.879494  | 0.44679  |
| C | 0.777924  | 1.471943  | 0.44595  |
| C | -0.552893 | 0.811518  | 0.38992  |
| C | 2.068128  | 0.956617  | 0.62778  |
| C | 1.679029  | 3.753062  | 0.54798  |
| C | 2.966186  | 3.222557  | 0.67739  |
| C | 3.152558  | 1.834416  | 0.73350  |
| H | 4.157461  | 1.427231  | 0.86550  |
| H | 2.239976  | -0.114756 | 0.69866  |
| H | 1.521350  | 4.833994  | 0.54528  |
| H | 3.826311  | 3.891231  | 0.75658  |
| H | -0.957392 | 5.319686  | 0.35121  |
| H | -3.456449 | 5.330216  | 0.29483  |
| H | -4.708541 | 3.180504  | 0.28604  |
| H | -3.526689 | 1.028946  | 0.32735  |
| C | -0.831801 | -0.530009 | 0.38380  |
| C | -2.151836 | -1.146856 | 0.85233  |
| C | 0.064244  | -1.677580 | 0.14875  |
| C | -1.652455 | -2.393071 | 1.64072  |
| C | -0.382255 | -2.756894 | 0.91372  |
| C | -3.056741 | -1.569474 | -0.31862 |
| H | -2.692855 | -0.459354 | 1.51544  |
| C | 1.131750  | -1.859030 | -0.79059 |
| C | 0.298258  | -3.990529 | 0.91814  |
| C | 1.403543  | -4.152430 | 0.10592  |
| C | 1.825837  | -3.118820 | -0.77874 |
| H | -0.052473 | -4.808697 | 1.55164  |
| H | 1.948718  | -5.099806 | 0.09941  |
| H | -2.384732 | -3.215863 | 1.65188  |
| H | -1.441869 | -2.120455 | 2.68977  |
| H | -2.548325 | -2.320005 | -0.94523 |
| H | -3.310852 | -0.715250 | -0.96408 |
| H | -3.994088 | -2.012197 | 0.05609  |
| C | 2.900719  | -3.323387 | -1.68905 |
| C | 3.251981  | -2.351738 | -2.60196 |
| C | 2.527683  | -1.135036 | -2.65295 |
| C | 1.494676  | -0.894949 | -1.76992 |
| H | 3.434237  | -4.277130 | -1.66300 |
| H | 4.075637  | -2.523750 | -3.29838 |
| H | 2.787690  | -0.380887 | -3.39894 |
| H | 0.941752  | 0.041837  | -1.81815 |

**Table S3:** Coordinates of optimized transition state between **1a** and **1b** configurations in the  $S_0$  state at B3LYP/cc-pVDZ level.

|   |           |           |          |
|---|-----------|-----------|----------|
| C | -4.926138 | -0.939191 | 1.09448  |
| C | -4.231275 | 0.266704  | 1.24359  |
| C | -2.999065 | 0.424334  | 0.61241  |
| C | -2.391739 | -0.632811 | -0.12439 |
| C | -3.141054 | -1.801017 | -0.32678 |
| C | -4.395576 | -1.947341 | 0.28554  |
| C | -2.209721 | 1.639113  | 0.40967  |
| C | -1.107460 | 1.309203  | -0.42535 |
| C | -1.004747 | -0.181275 | -0.51617 |
| C | -0.534414 | 2.345591  | -1.16844 |
| C | -2.532322 | 2.963599  | 0.70674  |
| C | -1.822689 | 3.992251  | 0.07808  |
| C | -0.870577 | 3.679149  | -0.89793 |
| H | -0.402417 | 4.476884  | -1.47850 |
| H | 0.114090  | 2.132873  | -2.01531 |
| H | -3.368922 | 3.192541  | 1.37088  |
| H | -2.066092 | 5.035562  | 0.29096  |
| H | -4.662843 | 1.087799  | 1.82004  |
| H | -5.897998 | -1.074919 | 1.57366  |
| H | -4.969036 | -2.859597 | 0.10728  |
| H | -2.805047 | -2.585342 | -1.00071 |
| C | 0.073064  | -1.051470 | -0.49448 |
| C | -0.212384 | -2.555479 | -0.62927 |
| C | 1.529699  | -0.952614 | -0.12678 |
| C | 0.922647  | -3.283230 | 0.09898  |
| C | 1.945035  | -2.216102 | 0.31838  |
| C | -0.307466 | -2.944502 | -2.11415 |
| H | -1.155712 | -2.806866 | -0.13811 |
| C | 2.502043  | 0.118027  | -0.03380 |
| C | 3.176574  | -2.450249 | 0.96627  |
| C | 4.045513  | -1.409189 | 1.17618  |
| C | 3.742044  | -0.117348 | 0.66565  |
| H | 3.411440  | -3.459040 | 1.31507  |
| H | 4.989329  | -1.562113 | 1.70543  |
| H | 1.335902  | -4.122005 | -0.48654 |
| H | 0.586887  | -3.704834 | 1.06172  |
| H | 0.647658  | -2.746260 | -2.62797 |
| H | -1.090251 | -2.365283 | -2.62841 |
| H | -0.538203 | -4.017854 | -2.22123 |
| C | 4.686882  | 0.936659  | 0.80260  |
| C | 4.472374  | 2.173433  | 0.23273  |
| C | 3.300968  | 2.384064  | -0.52657 |
| C | 2.360432  | 1.380553  | -0.64989 |
| H | 5.606537  | 0.736547  | 1.35818  |
| H | 5.210380  | 2.971284  | 0.34328  |
| H | 3.135899  | 3.340402  | -1.02738 |
| H | 1.491352  | 1.546103  | -1.26153 |

**Table S4:** Coordinates of optimized **2a** minimum in the  $S_0$  state at B3LYP/cc-pVDZ level.

|   |           |           |          |
|---|-----------|-----------|----------|
| C | -5.095025 | -0.733878 | 1.23501  |
| C | -4.445754 | 0.440013  | 0.83865  |
| C | -3.122257 | 0.369159  | 0.39918  |
| C | -2.439371 | -0.876201 | 0.33073  |
| C | -3.087435 | -2.035172 | 0.77949  |
| C | -4.414075 | -1.960030 | 1.21729  |
| C | -2.191563 | 1.423235  | 0.00061  |
| C | -0.922305 | 0.830264  | -0.25064 |
| C | -1.034066 | -0.637732 | -0.06823 |
| C | 0.120641  | 1.615728  | -0.73912 |
| C | -2.380904 | 2.789232  | -0.18784 |
| C | -1.320704 | 3.586209  | -0.63864 |
| C | -0.076873 | 2.994547  | -0.92211 |
| H | 1.097990  | 1.205132  | -0.98418 |
| H | -3.355981 | 3.244602  | -0.00004 |
| H | -1.478171 | 4.654586  | -0.77927 |
| H | -4.961270 | 1.402025  | 0.88785  |
| H | -6.130971 | -0.693190 | 1.57912  |
| H | -4.920826 | -2.866461 | 1.55596  |
| H | -2.567121 | -2.993039 | 0.80555  |
| C | -0.059354 | -1.588019 | -0.28076 |
| C | -0.322130 | -3.001212 | -0.83218 |
| C | 1.395220  | -1.438984 | -0.15212 |
| C | 1.039660  | -3.389877 | -1.48096 |
| C | 2.037307  | -2.461015 | -0.85581 |
| C | -1.453247 | -3.120626 | -1.86063 |
| H | -0.507658 | -3.693455 | 0.01095  |
| C | 2.175822  | -0.556953 | 0.67881  |
| C | 3.441112  | -2.556134 | -0.92197 |
| C | 4.210724  | -1.634959 | -0.24204 |
| C | 3.609054  | -0.644491 | 0.58657  |
| H | 3.908514  | -3.350476 | -1.50868 |
| H | 5.301562  | -1.679005 | -0.29545 |
| H | 0.988993  | -3.225211 | -2.57231 |
| H | 1.302569  | -4.449144 | -1.33226 |
| H | -1.293291 | -2.402202 | -2.68099 |
| H | -2.447605 | -2.928873 | -1.44255 |
| H | -1.456378 | -4.135438 | -2.29169 |
| C | 4.412262  | 0.231594  | 1.36850  |
| C | 3.839343  | 1.124898  | 2.24857  |
| C | 2.432508  | 1.157434  | 2.39683  |
| C | 1.623780  | 0.339569  | 1.63233  |
| H | 5.499326  | 0.168609  | 1.27245  |
| H | 4.467071  | 1.789031  | 2.84675  |
| H | 1.979390  | 1.832916  | 3.12575  |
| H | 0.545598  | 0.372104  | 1.76835  |
| O | 1.015118  | 3.674337  | -1.38648 |
| C | 0.900131  | 5.071081  | -1.59602 |
| H | 0.661579  | 5.609486  | -0.65998 |
| H | 1.880390  | 5.404768  | -1.96211 |
| H | 0.130345  | 5.312468  | -2.35240 |

**Table S5:** Coordinates of optimized **2b** minimum in the  $S_0$  state at B3LYP/cc-pVDZ level.

|   |           |           |          |
|---|-----------|-----------|----------|
| C | 5.310499  | -0.790058 | 0.65680  |
| C | 4.605839  | 0.405910  | 0.48621  |
| C | 3.236829  | 0.355952  | 0.21952  |
| C | 2.547411  | -0.883874 | 0.11847  |
| C | 3.266468  | -2.071639 | 0.31196  |
| C | 4.641695  | -2.017634 | 0.57133  |
| C | 2.280073  | 1.438048  | -0.00108 |
| C | 0.993377  | 0.868520  | -0.20507 |
| C | 1.101446  | -0.612171 | -0.10754 |
| C | -0.067929 | 1.693228  | -0.57337 |
| C | 2.470155  | 2.813253  | -0.09570 |
| C | 1.391245  | 3.647193  | -0.41650 |
| C | 0.130151  | 3.081759  | -0.66932 |
| H | -1.060165 | 1.312163  | -0.79895 |
| H | 3.459765  | 3.248151  | 0.06156  |
| H | 1.548793  | 4.722577  | -0.48579 |
| H | 5.118392  | 1.367587  | 0.56327  |
| H | 6.382856  | -0.766856 | 0.86351  |
| H | 5.195591  | -2.948344 | 0.71312  |
| H | 2.780902  | -3.043771 | 0.27441  |
| C | 0.106564  | -1.542094 | -0.25570 |
| C | 0.331059  | -2.997367 | -0.67300 |
| C | -1.357217 | -1.361823 | -0.26871 |
| C | -0.844166 | -3.221962 | -1.66926 |
| C | -1.916264 | -2.310237 | -1.12733 |
| C | 0.236121  | -3.974971 | 0.51170  |
| H | 1.297594  | -3.115344 | -1.17998 |
| C | -2.208230 | -0.527212 | 0.52722  |
| C | -3.303356 | -2.360783 | -1.36882 |
| C | -4.135309 | -1.484200 | -0.70017 |
| C | -3.622805 | -0.578512 | 0.27254  |
| H | -3.712024 | -3.090927 | -2.07144 |
| H | -5.213523 | -1.502762 | -0.87882 |
| H | -1.168435 | -4.273467 | -1.72083 |
| H | -0.543978 | -2.915853 | -2.68679 |
| H | -0.760774 | -3.917391 | 0.97792  |
| H | 0.980125  | -3.744075 | 1.28893  |
| H | 0.398230  | -5.011428 | 0.17317  |
| C | -4.491915 | 0.252089  | 1.03442  |
| C | -4.000633 | 1.065313  | 2.03335  |
| C | -2.614032 | 1.068236  | 2.32436  |
| C | -1.740574 | 0.292176  | 1.59025  |
| H | -5.564019 | 0.220557  | 0.82335  |
| H | -4.679229 | 1.694662  | 2.61339  |
| H | -2.232935 | 1.688964  | 3.13821  |
| H | -0.676868 | 0.298054  | 1.82265  |
| O | -0.981684 | 3.794860  | -1.02274 |
| C | -0.866997 | 5.201441  | -1.15011 |
| H | -1.863039 | 5.562289  | -1.43979 |
| H | -0.573209 | 5.678492  | -0.19663 |
| H | -0.137608 | 5.486364  | -1.93100 |

**Table S6:** Coordinates of optimized transition state between **2a** and **2b** configurations in the  $S_0$  state at B3LYP/cc-pVDZ level.

|   |           |           |          |
|---|-----------|-----------|----------|
| C | 4.738677  | -1.944209 | -1.09743 |
| C | 4.154228  | -0.700177 | -1.36244 |
| C | 2.952553  | -0.365224 | -0.74076 |
| C | 2.266171  | -1.284650 | 0.10549  |
| C | 2.907626  | -2.491779 | 0.41642  |
| C | 4.132837  | -2.814706 | -0.18799 |
| C | 2.274367  | 0.928109  | -0.66427 |
| C | 1.165136  | 0.784899  | 0.21710  |
| C | 0.931270  | -0.672271 | 0.46074  |
| C | 0.684833  | 1.927042  | 0.84522  |
| C | 2.690426  | 2.184333  | -1.09026 |
| C | 2.068863  | 3.336862  | -0.58589 |
| C | 1.099734  | 3.202544  | 0.41743  |
| H | 0.032255  | 1.892253  | 1.71342  |
| H | 3.532953  | 2.284584  | -1.77811 |
| H | 2.394732  | 4.317724  | -0.92913 |
| H | 4.648397  | 0.015255  | -2.02385 |
| H | 5.685656  | -2.215807 | -1.56905 |
| H | 4.622429  | -3.755179 | 0.07456  |
| H | 2.511155  | -3.171741 | 1.16698  |
| C | -0.224217 | -1.432416 | 0.53544  |
| C | -0.077047 | -2.934993 | 0.82287  |
| C | -1.670505 | -1.233840 | 0.16687  |
| C | -1.294396 | -3.623267 | 0.19533  |
| C | -2.211396 | -2.491595 | -0.13682 |
| C | 0.022906  | -3.176303 | 2.33808  |
| H | 0.826359  | -3.322428 | 0.34398  |
| C | -2.536166 | -0.089552 | -0.04345 |
| C | -3.467146 | -2.672553 | -0.75505 |
| C | -4.231187 | -1.580372 | -1.08249 |
| C | -3.797308 | -0.275982 | -0.71935 |
| H | -3.803404 | -3.685411 | -0.98975 |
| H | -5.189593 | -1.697468 | -1.59437 |
| H | -1.775344 | -4.342776 | 0.87954  |
| H | -1.023570 | -4.186138 | -0.71438 |
| H | -0.896045 | -2.837751 | 2.84528  |
| H | 0.868593  | -2.622973 | 2.77525  |
| H | 0.157159  | -4.249722 | 2.55317  |
| C | -4.630101 | 0.847308  | -0.98018 |
| C | -4.287013 | 2.113070  | -0.55351 |
| C | -3.098862 | 2.287398  | 0.18920  |
| C | -2.268363 | 1.211723  | 0.43292  |
| H | -5.568527 | 0.680298  | -1.51539 |
| H | -4.939633 | 2.963869  | -0.76129 |
| H | -2.827035 | 3.270146  | 0.58147  |
| H | -1.389836 | 1.353950  | 1.03479  |
| O | 0.495401  | 4.242757  | 1.06968  |
| C | 0.901663  | 5.562513  | 0.74495  |
| H | 0.690107  | 5.807549  | -0.31209 |
| H | 0.316025  | 6.228840  | 1.39226  |
| H | 1.978453  | 5.719389  | 0.94027  |

**Table S7:** Coordinates of optimized **3a** minimum in the  $S_0$  state at B3LYP/cc-pVDZ level.

|   |           |           |          |
|---|-----------|-----------|----------|
| C | -4.788078 | 1.885124  | 0.46213  |
| C | -4.683285 | 0.494116  | 0.35596  |
| C | -3.441485 | -0.069779 | 0.06193  |
| C | -2.291542 | 0.740395  | -0.13687 |
| C | -2.404888 | 2.130239  | 0.00605  |
| C | -3.654742 | 2.691742  | 0.29454  |
| C | -3.050044 | -1.472492 | -0.08459 |
| C | -1.653639 | -1.526201 | -0.33768 |
| C | -1.118841 | -0.140355 | -0.37242 |
| C | -1.063996 | -2.760966 | -0.63757 |
| C | -3.826972 | -2.631791 | -0.06194 |
| C | -3.214349 | -3.863165 | -0.31600 |
| C | -1.846416 | -3.921032 | -0.61580 |
| H | -1.380691 | -4.883306 | -0.83975 |
| H | -0.009775 | -2.831665 | -0.89550 |
| H | -4.900085 | -2.575211 | 0.13423  |
| H | -3.807273 | -4.780451 | -0.29989 |
| H | -5.558200 | -0.141904 | 0.50859  |
| H | -5.753263 | 2.343059  | 0.68991  |
| H | -3.740848 | 3.775583  | 0.39945  |
| H | -1.538846 | 2.784075  | -0.07307 |
| C | 0.158025  | 0.271035  | -0.64924 |
| C | 1.418047  | -0.490451 | -0.65376 |
| C | 1.647603  | 1.273031  | -2.24180 |
| C | 2.280328  | 0.066690  | -1.59938 |
| C | 0.967511  | 2.684175  | -0.22946 |
| C | 1.888821  | -1.520584 | 0.22566  |
| C | 3.562036  | -0.467446 | -1.83602 |
| C | 3.996214  | -1.536205 | -1.07680 |
| C | 3.197237  | -2.064047 | -0.02200 |
| H | 4.204780  | -0.031819 | -2.60448 |
| H | 4.985924  | -1.967454 | -1.24754 |
| H | 2.359607  | 2.097564  | -2.39411 |
| H | 1.214410  | 1.015117  | -3.22420 |
| C | 3.688961  | -3.094182 | 0.82774  |
| C | 2.949927  | -3.540966 | 1.90278  |
| C | 1.688222  | -2.960891 | 2.18238  |
| C | 1.170530  | -1.977018 | 1.36412  |
| H | 4.677030  | -3.514405 | 0.62274  |
| H | 3.342148  | -4.328098 | 2.55048  |
| H | 1.120003  | -3.293643 | 3.05371  |
| H | 0.199693  | -1.537562 | 1.58767  |
| C | 0.502619  | 1.639609  | -1.23988 |
| C | 1.080553  | 4.022614  | -0.64149 |
| C | 1.512285  | 5.013036  | 0.24273  |
| C | 1.840635  | 4.679613  | 1.56139  |
| C | 1.727548  | 3.352625  | 1.98273  |
| C | 1.292158  | 2.362856  | 1.09534  |
| H | -0.357088 | 2.048533  | -1.78874 |
| H | 0.819927  | 4.290025  | -1.66976 |
| H | 1.588717  | 6.048853  | -0.09667 |
| H | 1.196263  | 1.332795  | 1.44196  |
| H | 2.176566  | 5.452054  | 2.25685  |
| H | 1.975102  | 3.081879  | 3.01184  |



**Table S8:** Coordinates of optimized **3b** minimum in the  $S_0$  state at B3LYP/cc-pVDZ level.

|   |           |           |          |
|---|-----------|-----------|----------|
| C | 3.765972  | 2.468619  | -1.76357 |
| C | 2.864277  | 3.087558  | -0.89141 |
| C | 1.772847  | 2.357627  | -0.41839 |
| C | 1.576659  | 1.002649  | -0.79559 |
| C | 2.460599  | 0.412488  | -1.70691 |
| C | 3.556379  | 1.144401  | -2.17492 |
| C | 0.662692  | 2.757953  | 0.44695  |
| C | -0.240249 | 1.665582  | 0.55262  |
| C | 0.307536  | 0.515840  | -0.21123 |
| C | -1.336836 | 1.768674  | 1.41876  |
| C | 0.441749  | 3.947391  | 1.14350  |
| C | -0.681725 | 4.050979  | 1.97001  |
| C | -1.554984 | 2.963307  | 2.11328  |
| H | -2.418214 | 3.045332  | 2.77751  |
| H | -2.018711 | 0.932136  | 1.56022  |
| H | 1.145645  | 4.778231  | 1.05606  |
| H | -0.870575 | 4.976097  | 2.51931  |
| H | 3.004657  | 4.129641  | -0.59521 |
| H | 4.627946  | 3.024197  | -2.13979 |
| H | 4.254701  | 0.676801  | -2.87249 |
| H | 2.306936  | -0.605109 | -2.05965 |
| C | -0.196810 | -0.762272 | -0.27605 |
| C | 0.644827  | -2.046585 | -0.40056 |
| C | -1.591583 | -1.198884 | -0.12379 |
| C | -0.237002 | -3.103097 | 0.34388  |
| C | -1.626124 | -2.543636 | 0.25121  |
| C | 2.056380  | -2.046948 | 0.15702  |
| H | 0.682685  | -2.343350 | -1.46453 |
| C | -2.819621 | -0.523011 | -0.45082 |
| C | -2.837519 | -3.223042 | 0.48425  |
| C | -4.030089 | -2.553816 | 0.29770  |
| C | -4.053755 | -1.217027 | -0.19398 |
| H | -2.826869 | -4.266428 | 0.80781  |
| H | -4.981439 | -3.057813 | 0.48634  |
| H | 0.091013  | -3.174061 | 1.39502  |
| H | -0.146290 | -4.110276 | -0.09055 |
| C | -5.287879 | -0.569491 | -0.48138 |
| C | -5.315570 | 0.688940  | -1.04373 |
| C | -4.100933 | 1.342989  | -1.36144 |
| C | -2.886515 | 0.753213  | -1.07178 |
| H | -6.218880 | -1.099547 | -0.26421 |
| H | -6.269518 | 1.173076  | -1.26396 |
| H | -4.122712 | 2.322805  | -1.84342 |
| H | -1.962857 | 1.267019  | -1.32885 |
| C | 2.366965  | -1.412063 | 1.36960  |
| C | 3.658582  | -1.471902 | 1.89490  |
| C | 4.663455  | -2.175742 | 1.22224  |
| C | 4.362378  | -2.823317 | 0.02184  |
| C | 3.067634  | -2.758496 | -0.50216 |
| H | 2.840917  | -3.260730 | -1.44720 |
| H | 5.137582  | -3.376888 | -0.51334 |
| H | 5.675397  | -2.216562 | 1.63148  |
| H | 3.883884  | -0.959605 | 2.83320  |
| H | 1.594279  | -0.848241 | 1.89578  |

**Table S9:** Coordinates of optimized transition state between **3a** and **3b** configurations in the  $S_0$  state at B3LYP/cc-pVDZ level.

|   |           |           |          |
|---|-----------|-----------|----------|
| C | 0.800975  | -3.802230 | 1.93182  |
| C | 0.205254  | -4.793136 | 1.14485  |
| C | -0.724500 | -4.430847 | 0.16316  |
| H | -1.298635 | -5.195150 | -0.36529 |
| H | 0.404290  | -5.847594 | 1.34818  |
| H | 1.430331  | -4.083455 | 2.77891  |
| C | 0.569905  | -2.444567 | 1.66936  |
| H | 0.946536  | -1.706377 | 2.37461  |
| C | -0.216861 | -2.060934 | 0.57959  |
| C | -0.969287 | -3.077841 | -0.06961 |
| C | -2.116962 | -2.441479 | -0.71903 |
| C | -3.209902 | -3.024397 | -1.35729 |
| H | -3.209848 | -4.093001 | -1.58390 |
| C | -4.323002 | -2.232303 | -1.66351 |
| H | -5.192060 | -2.675942 | -2.15415 |
| C | -4.340366 | -0.886441 | -1.28783 |
| H | -5.237939 | -0.286840 | -1.45552 |
| C | -3.228383 | -0.290459 | -0.67235 |
| H | -3.314588 | 0.737052  | -0.32688 |
| C | -2.073371 | -1.047346 | -0.43474 |
| C | -0.693691 | -0.728490 | 0.08833  |
| C | -0.035660 | 0.434417  | -0.27402 |
| C | -0.891293 | 1.616904  | -0.76187 |
| C | -1.422749 | 2.479945  | 0.37692  |
| C | -0.806483 | 2.532277  | 1.63517  |
| C | -1.296992 | 3.376652  | 2.63619  |
| C | -2.414716 | 4.180904  | 2.39833  |
| C | -3.038953 | 4.136839  | 1.14754  |
| C | -2.544096 | 3.295395  | 0.14856  |
| H | -3.036387 | 3.267524  | -0.82815 |
| H | -3.916287 | 4.757414  | 0.94969  |
| H | -2.799898 | 4.835694  | 3.18322  |
| H | -0.802011 | 3.402700  | 3.60999  |
| H | 0.063065  | 1.904711  | 1.83679  |
| H | -1.751211 | 1.246666  | -1.32758 |
| C | -0.003912 | 2.424473  | -1.72737 |
| H | -0.070344 | 3.509932  | -1.55456 |
| H | -0.289869 | 2.246755  | -2.77852 |
| C | 1.368399  | 1.902210  | -1.46119 |
| C | 2.516716  | 2.405282  | -2.10811 |
| C | 3.743761  | 1.847492  | -1.85142 |
| H | 4.642078  | 2.205280  | -2.36043 |
| H | 2.408728  | 3.225444  | -2.82182 |
| C | 1.390206  | 0.829948  | -0.55792 |
| C | 2.696575  | 0.315703  | -0.19635 |
| C | 3.864142  | 0.812698  | -0.88444 |
| C | 5.148099  | 0.292003  | -0.56408 |
| H | 6.011401  | 0.672877  | -1.11585 |
| C | 5.315765  | -0.651218 | 0.42729  |
| H | 6.309382  | -1.038415 | 0.66283  |
| C | 4.187242  | -1.087533 | 1.15451  |
| H | 4.303573  | -1.803544 | 1.97143  |
| C | 2.929683  | -0.608792 | 0.84452  |
| H | 2.086426  | -0.932509 | 1.42684  |

**Table S10:** Coordinates of optimized **4a** minimum in the  $S_0$  state at B3LYP/cc-pVDZ level.

|   |           |           |          |
|---|-----------|-----------|----------|
| C | -4.812101 | -0.454717 | -1.79913 |
| C | -4.247638 | -1.378944 | -0.91567 |
| C | -2.952966 | -1.159898 | -0.43951 |
| C | -2.208343 | -0.013315 | -0.83075 |
| C | -2.776385 | 0.884173  | -1.74589 |
| C | -4.074490 | 0.664586  | -2.21548 |
| C | -2.122268 | -1.960133 | 0.45811  |
| C | -0.846548 | -1.339752 | 0.55516  |
| C | -0.849789 | -0.100097 | -0.25002 |
| C | 0.086691  | -1.837131 | 1.47728  |
| C | -2.428763 | -3.098377 | 1.20725  |
| C | -1.467133 | -3.615281 | 2.08082  |
| C | -0.225119 | -2.977148 | 2.22315  |
| H | 0.508524  | -3.371752 | 2.92965  |
| H | 1.047771  | -1.343961 | 1.61681  |
| H | -3.413816 | -3.564046 | 1.12750  |
| H | -1.691321 | -4.505680 | 2.67248  |
| H | -4.806608 | -2.265890 | -0.60842 |
| H | -5.824860 | -0.609688 | -2.17760 |
| H | -4.517229 | 1.372607  | -2.91974 |
| H | -2.218605 | 1.749585  | -2.10296 |
| C | 0.157821  | 0.844645  | -0.35145 |
| C | -0.103450 | 2.365294  | -0.30305 |
| C | 1.605477  | 0.636474  | -0.37524 |
| C | 1.276237  | 2.996580  | -0.60123 |
| C | 2.253907  | 1.878748  | -0.39516 |
| C | -0.667079 | 2.844055  | 1.10424  |
| H | -0.843530 | 2.681799  | -1.04844 |
| C | 2.405352  | -0.554701 | -0.55985 |
| C | 3.654271  | 1.999340  | -0.31971 |
| C | 4.427379  | 0.857899  | -0.28043 |
| C | 3.834873  | -0.427399 | -0.44324 |
| H | 4.115032  | 2.989491  | -0.29001 |
| H | 5.514140  | 0.926247  | -0.18683 |
| H | 1.502916  | 3.877786  | 0.01260  |
| H | 1.343247  | 3.328768  | -1.65252 |
| C | 0.301568  | 2.479822  | 2.24484  |
| C | -2.041745 | 2.229702  | 1.42406  |
| C | -0.864158 | 4.374622  | 1.05106  |
| C | 4.652305  | -1.585087 | -0.56453 |
| C | 4.105012  | -2.813987 | -0.86816 |
| C | 2.712894  | -2.919801 | -1.09083 |
| C | 1.887825  | -1.821442 | -0.93825 |
| H | 5.733032  | -1.475158 | -0.44266 |
| H | 4.744464  | -3.693597 | -0.96928 |
| H | 2.281743  | -3.876842 | -1.39245 |
| H | 0.824265  | -1.924770 | -1.13244 |
| H | 0.078311  | 4.926067  | 0.91639  |
| H | -1.541942 | 4.656704  | 0.22787  |
| H | -1.316084 | 4.729566  | 1.99122  |
| H | -2.430713 | 2.676478  | 2.35388  |
| H | -2.771708 | 2.422474  | 0.62401  |
| H | -1.989541 | 1.144552  | 1.57991  |
| H | 1.303260  | 2.914989  | 2.10452  |
| H | -0.090233 | 2.853579  | 3.20492  |
| H | 0.417652  | 1.388315  | 2.33163  |

**Table S11:** Coordinates of optimized **4b** minimum in the  $S_0$  state at B3LYP/cc-pVDZ level.

|   |           |           |          |
|---|-----------|-----------|----------|
| C | -1.966018 | -4.237854 | -0.57549 |
| C | -2.911548 | -3.268484 | -0.22836 |
| C | -2.516467 | -1.931009 | -0.16584 |
| C | -1.174828 | -1.541190 | -0.40981 |
| C | -0.253983 | -2.518163 | -0.81137 |
| C | -0.653430 | -3.857367 | -0.88461 |
| C | -3.317427 | -0.726112 | 0.04123  |
| C | -2.474550 | 0.410574  | -0.09712 |
| C | -1.070162 | -0.058267 | -0.29732 |
| C | -3.061916 | 1.681325  | -0.01446 |
| C | -4.685591 | -0.600939 | 0.28708  |
| C | -5.247095 | 0.675422  | 0.37894  |
| C | -4.436805 | 1.805878  | 0.21795  |
| H | -4.878653 | 2.803261  | 0.27364  |
| H | -2.476167 | 2.587978  | -0.13340 |
| H | -5.309031 | -1.491088 | 0.39683  |
| H | -6.316638 | 0.791431  | 0.56735  |
| H | -3.948688 | -3.549234 | -0.03167 |
| H | -2.256648 | -5.289376 | -0.63050 |
| H | 0.072557  | -4.613228 | -1.19220 |
| H | 0.764441  | -2.254153 | -1.08286 |
| C | 0.066564  | 0.702769  | -0.37139 |
| C | 0.125766  | 2.202401  | -0.66588 |
| C | 1.470223  | 0.248825  | -0.49092 |
| C | 1.201190  | 2.217554  | -1.79779 |
| C | 2.121415  | 1.093101  | -1.38865 |
| C | 0.494210  | 3.131604  | 0.56052  |
| H | -0.830473 | 2.553952  | -1.06740 |
| C | 2.210028  | -0.729537 | 0.24308  |
| C | 3.472001  | 0.894593  | -1.73707 |
| C | 4.183474  | -0.117109 | -1.12153 |
| C | 3.591749  | -0.922365 | -0.10599 |
| H | 3.952832  | 1.547795  | -2.46913 |
| H | 5.233154  | -0.285785 | -1.37543 |
| H | 1.724963  | 3.178811  | -1.90354 |
| H | 0.714143  | 2.001777  | -2.76460 |
| C | -0.336551 | 2.753157  | 1.80232  |
| C | 0.161839  | 4.580605  | 0.15588  |
| C | 1.980420  | 3.060242  | 0.97007  |
| C | 4.351776  | -1.892560 | 0.60611  |
| C | 3.792912  | -2.610679 | 1.64208  |
| C | 2.446455  | -2.379309 | 2.02007  |
| C | 1.673956  | -1.462997 | 1.33675  |
| H | 5.397299  | -2.046954 | 0.32681  |
| H | 4.389720  | -3.347758 | 2.18387  |
| H | 2.017303  | -2.931305 | 2.85908  |
| H | 0.638308  | -1.290817 | 1.62799  |
| H | 2.261348  | 2.059232  | 1.32690  |
| H | 2.662387  | 3.328489  | 0.14959  |
| H | 2.163230  | 3.771773  | 1.79228  |
| H | 0.399977  | 5.278279  | 0.97522  |
| H | 0.736313  | 4.899151  | -0.72920 |
| H | -0.909380 | 4.694762  | -0.08030 |
| H | -0.149137 | 1.711056  | 2.10403  |
| H | -0.062659 | 3.404334  | 2.64863  |
| H | -1.416142 | 2.862960  | 1.63741  |

**Table S12:** Coordinates of optimized transition state between **4a** and **4b** configurations in the  $S_0$  state at B3LYP/cc-pVDZ level.

|   |           |           |          |
|---|-----------|-----------|----------|
| C | -2.357926 | 1.621585  | 0.71060  |
| C | -2.441510 | 0.562794  | -0.22277 |
| C | -3.613777 | 0.539906  | -1.06539 |
| C | -4.542297 | 1.616014  | -1.01120 |
| C | -4.381324 | 2.660717  | -0.12649 |
| C | -3.285776 | 2.642692  | 0.76445  |
| C | -3.870900 | -0.574013 | -1.91058 |
| C | -3.027699 | -1.657976 | -1.89538 |
| C | -1.862721 | -1.626234 | -1.10180 |
| C | -1.488798 | -0.521972 | -0.32311 |
| C | -0.860580 | -2.736070 | -1.05702 |
| C | 0.144277  | -2.270851 | 0.00669  |
| C | -0.063483 | -0.757631 | 0.10125  |
| C | 1.029252  | 0.080703  | 0.24822  |
| C | 2.390330  | -0.228055 | -0.33445 |
| C | 2.957501  | 1.010987  | -0.76165 |
| C | 2.184570  | 2.105874  | -0.17723 |
| C | 1.108983  | 1.535082  | 0.55031  |
| C | 3.138730  | -1.391323 | -0.57188 |
| C | 4.340547  | -1.328412 | -1.29196 |
| C | 4.830071  | -0.114020 | -1.78049 |
| C | 4.140632  | 1.068712  | -1.49681 |
| C | 0.533391  | 2.299085  | 1.57022  |
| C | 0.851990  | 3.657011  | 1.69488  |
| C | 1.787504  | 4.251496  | 0.83890  |
| C | 2.492184  | 3.463421  | -0.07800 |
| C | 0.001386  | -2.986041 | 1.40617  |
| H | 0.386159  | 4.247627  | 2.48673  |
| H | -0.104722 | 1.832682  | 2.31903  |
| H | 3.310892  | 3.890875  | -0.66115 |
| H | 2.019732  | 5.314168  | 0.93769  |
| H | 4.534053  | 2.033622  | -1.82461 |
| H | 5.763177  | -0.084818 | -2.34704 |
| H | 4.908262  | -2.247729 | -1.45256 |
| H | 2.849013  | -2.356119 | -0.16365 |
| H | 1.150325  | -2.501787 | -0.33894 |
| H | -3.233574 | -2.540390 | -2.50612 |
| H | -4.763499 | -0.565355 | -2.54090 |
| H | -1.337573 | -3.702448 | -0.83577 |
| H | -0.365389 | -2.847428 | -2.03718 |
| C | -1.419166 | -2.855360 | 1.98425  |
| C | 1.002594  | -2.389034 | 2.41305  |
| C | 0.345067  | -4.477139 | 1.21950  |
| H | -5.407423 | 1.585499  | -1.67866 |
| H | -5.106155 | 3.477014  | -0.09423 |
| H | -3.170752 | 3.434912  | 1.50778  |
| H | -1.550486 | 1.608576  | 1.42293  |
| H | -2.183624 | -3.269481 | 1.30833  |
| H | -1.489267 | -3.401289 | 2.93962  |
| H | -1.681040 | -1.803834 | 2.17657  |
| H | 2.036811  | -2.438262 | 2.03717  |
| H | 0.781968  | -1.334878 | 2.63340  |
| H | 0.963065  | -2.950176 | 3.36106  |
| H | -0.351203 | -4.983651 | 0.53324  |
| H | 1.364869  | -4.603071 | 0.81825  |
| H | 0.298081  | -5.005953 | 2.18536  |

**Table S13:** Coordinates of optimized **5a** minimum in the  $S_0$  state at B3LYP/cc-pVDZ level.

|   |           |           |          |
|---|-----------|-----------|----------|
| C | 0.294815  | -2.387029 | 2.38785  |
| C | -0.503057 | -3.393545 | 1.85164  |
| C | -1.401013 | -3.101509 | 0.82452  |
| H | -2.034855 | -3.904320 | 0.43876  |
| H | -0.444274 | -4.412356 | 2.24583  |
| H | 0.983224  | -2.604311 | 3.20941  |
| C | 0.209569  | -1.099173 | 1.87201  |
| H | 0.823706  | -0.292886 | 2.28851  |
| C | -0.656947 | -0.808784 | 0.81230  |
| C | -1.502334 | -1.810474 | 0.30314  |
| C | -2.451326 | -1.414952 | -0.81951 |
| C | -3.529379 | -2.469718 | -1.03337 |
| H | -3.074598 | -3.437043 | -1.29748 |
| H | -4.187908 | -2.201926 | -1.87376 |
| H | -4.152253 | -2.614129 | -0.13514 |
| C | -1.664904 | -1.284387 | -2.13909 |
| H | -1.189349 | -2.245849 | -2.39939 |
| H | -0.877073 | -0.516698 | -2.08466 |
| H | -2.347969 | -1.001311 | -2.95760 |
| C | -3.035997 | -0.046923 | -0.46128 |
| C | -4.375722 | 0.252930  | -0.71018 |
| H | -5.030533 | -0.503703 | -1.14874 |
| C | -4.917219 | 1.500351  | -0.40975 |
| H | -5.972916 | 1.701806  | -0.61205 |
| C | -4.106916 | 2.469576  | 0.16333  |
| H | -4.513866 | 3.448001  | 0.43428  |
| C | -2.765187 | 2.194056  | 0.41026  |
| H | -2.172965 | 2.964211  | 0.90002  |
| C | -2.192155 | 0.952861  | 0.09324  |
| C | -0.767186 | 0.568984  | 0.30120  |
| C | 0.316859  | 1.374769  | 0.05453  |
| C | 0.219913  | 2.895628  | 0.12812  |
| C | 0.142390  | 3.295888  | 1.60594  |
| H | -0.006274 | 4.382961  | 1.72004  |
| H | 1.089022  | 3.032024  | 2.10956  |
| H | -0.658913 | 2.773231  | 2.15077  |
| H | -0.657314 | 3.279806  | -0.41851 |
| C | 1.526747  | 3.425770  | -0.44595 |
| H | 1.883421  | 4.334219  | 0.07002  |
| H | 1.436438  | 3.690365  | -1.51661 |
| C | 2.449559  | 2.261920  | -0.31078 |
| C | 3.852870  | 2.327268  | -0.37549 |
| C | 4.579564  | 1.165092  | -0.33460 |
| H | 5.674308  | 1.182081  | -0.34095 |
| H | 4.346736  | 3.302091  | -0.44108 |
| C | 1.748904  | 1.060797  | -0.16628 |
| C | 2.488238  | -0.165553 | -0.35083 |
| C | 3.921432  | -0.092073 | -0.36034 |
| C | 4.688598  | -1.279721 | -0.46767 |
| H | 5.780173  | -1.192743 | -0.43834 |
| C | 4.089389  | -2.503693 | -0.64223 |
| H | 4.693803  | -3.410856 | -0.73072 |
| C | 2.686815  | -2.569156 | -0.75128 |
| H | 2.194762  | -3.525361 | -0.95468 |
| C | 1.916293  | -1.436232 | -0.61019 |
| H | 0.839795  | -1.525127 | -0.73297 |

**Table S14:** Coordinates of optimized **5b** minimum in the  $S_0$  state at B3LYP/cc-pVDZ level.

|   |           |           |          |
|---|-----------|-----------|----------|
| C | 0.354469  | -2.666790 | -2.16899 |
| C | -0.478367 | -3.596263 | -1.54316 |
| C | -1.399193 | -3.175700 | -0.57661 |
| H | -2.048631 | -3.919667 | -0.11559 |
| H | -0.424440 | -4.653378 | -1.81338 |
| H | 1.064941  | -2.987227 | -2.93393 |
| C | 0.275448  | -1.321375 | -1.80973 |
| H | 0.923129  | -0.583354 | -2.28537 |
| C | -0.626171 | -0.898293 | -0.82404 |
| C | -1.496858 | -1.827652 | -0.21093 |
| C | -2.489531 | -1.298505 | 0.84127  |
| C | -1.731162 | -0.997968 | 2.16514  |
| H | -2.435119 | -0.623454 | 2.92540  |
| H | -0.950065 | -0.238248 | 2.02537  |
| H | -1.256195 | -1.915128 | 2.54902  |
| C | -3.585447 | -2.327771 | 1.15752  |
| H | -3.144150 | -3.246872 | 1.56981  |
| H | -4.170056 | -2.593193 | 0.26386  |
| H | -4.274415 | -1.942225 | 1.92289  |
| C | -3.070957 | 0.014695  | 0.28500  |
| C | -4.430615 | 0.338857  | 0.36696  |
| H | -5.124314 | -0.335380 | 0.86842  |
| C | -4.933643 | 1.513549  | -0.20145 |
| H | -5.999688 | 1.739456  | -0.12578 |
| C | -4.077064 | 2.370635  | -0.89251 |
| H | -4.465112 | 3.266907  | -1.38163 |
| C | -2.716963 | 2.066359  | -0.97389 |
| H | -2.058181 | 2.708301  | -1.55912 |
| C | -2.190431 | 0.921319  | -0.35622 |
| C | -0.751849 | 0.528300  | -0.43368 |
| C | 0.289524  | 1.346956  | -0.11544 |
| C | 0.174404  | 2.843978  | 0.19524  |
| C | 0.142958  | 3.081315  | 1.71453  |
| H | 0.107414  | 4.160057  | 1.93941  |
| H | 1.036878  | 2.657168  | 2.20045  |
| H | -0.746379 | 2.607857  | 2.15977  |
| H | -0.720683 | 3.296248  | -0.23780 |
| C | 1.455457  | 3.416604  | -0.46221 |
| H | 1.831736  | 4.321101  | 0.04256  |
| H | 1.261142  | 3.684926  | -1.51646 |
| C | 2.422854  | 2.263505  | -0.36855 |
| C | 3.825045  | 2.317977  | -0.51026 |
| C | 4.566274  | 1.170768  | -0.32402 |
| H | 5.652771  | 1.187192  | -0.44251 |
| H | 4.311594  | 3.263005  | -0.76398 |
| C | 1.753685  | 1.071896  | -0.08512 |
| C | 2.514208  | -0.098353 | 0.25452  |
| C | 3.943504  | -0.042354 | 0.08799  |
| C | 4.725241  | -1.191633 | 0.39423  |
| H | 5.806749  | -1.141915 | 0.24242  |
| C | 4.143176  | -2.335508 | 0.89695  |
| H | 4.756373  | -3.208033 | 1.13339  |
| C | 2.747737  | -2.365365 | 1.13373  |
| H | 2.288477  | -3.256117 | 1.56793  |
| C | 1.958244  | -1.278089 | 0.82093  |
| H | 0.892369  | -1.318579 | 1.02179  |

**Table S15:** Coordinates of optimized transition state between **5a** and **5b** configurations in the  $S_0$  state at B3LYP/cc-pVDZ level.

|   |           |           |          |
|---|-----------|-----------|----------|
| C | 0.009863  | 3.582432  | -1.14023 |
| C | 0.522536  | 4.049352  | 0.06885  |
| C | 1.150898  | 3.156358  | 0.94397  |
| H | 1.631466  | 3.553801  | 1.83753  |
| H | 0.491422  | 5.114306  | 0.30985  |
| H | -0.399488 | 4.277260  | -1.87673 |
| C | 0.035851  | 2.213016  | -1.41296 |
| H | -0.303855 | 1.854412  | -2.38435 |
| C | 0.531588  | 1.294028  | -0.48089 |
| C | 1.212352  | 1.786619  | 0.66299  |
| C | 2.127593  | 0.813693  | 1.43674  |
| C | 1.288660  | -0.116838 | 2.35394  |
| H | 0.803787  | 0.483562  | 3.14008  |
| H | 1.940180  | -0.861776 | 2.83844  |
| H | 0.501822  | -0.646609 | 1.80579  |
| C | 3.117772  | 1.564820  | 2.34248  |
| H | 2.581993  | 2.145867  | 3.10710  |
| H | 3.762084  | 2.250043  | 1.77187  |
| H | 3.759337  | 0.852820  | 2.88251  |
| C | 2.876436  | 0.012864  | 0.34223  |
| C | 4.250903  | -0.246079 | 0.36766  |
| H | 4.855244  | 0.062574  | 1.22069  |
| C | 4.885390  | -0.888592 | -0.70439 |
| H | 5.961516  | -1.071645 | -0.66142 |
| C | 4.154129  | -1.262850 | -1.83312 |
| H | 4.652304  | -1.733735 | -2.68358 |
| C | 2.775558  | -1.035347 | -1.86383 |
| H | 2.179701  | -1.340085 | -2.72690 |
| C | 2.134906  | -0.438976 | -0.77379 |
| C | 0.665867  | -0.180140 | -0.72819 |
| C | -0.239114 | -1.201121 | -0.62743 |
| C | 0.192268  | -2.707060 | -0.60529 |
| C | 1.448770  | -3.129692 | 0.18515  |
| H | 1.465551  | -4.231114 | 0.23609  |
| H | 1.404238  | -2.750984 | 1.21751  |
| H | 2.397334  | -2.811206 | -0.25282 |
| H | 0.322451  | -3.024854 | -1.65381 |
| C | -1.011690 | -3.462725 | 0.01457  |
| H | -0.727435 | -3.967154 | 0.95319  |
| H | -1.401602 | -4.250893 | -0.65219 |
| C | -2.052061 | -2.420255 | 0.25657  |
| C | -3.259190 | -2.638420 | 0.95655  |
| C | -4.150465 | -1.603307 | 1.11180  |
| H | -5.068079 | -1.734905 | 1.69064  |
| H | -3.458603 | -3.621578 | 1.38992  |
| C | -1.693453 | -1.179591 | -0.26931 |
| C | -2.719345 | -0.163189 | -0.31463 |
| C | -3.924476 | -0.363278 | 0.45078  |
| C | -4.919513 | 0.653032  | 0.46701  |
| H | -5.808504 | 0.498796  | 1.08424  |
| C | -4.796724 | 1.786889  | -0.30840 |
| H | -5.574247 | 2.553853  | -0.29381 |
| C | -3.681525 | 1.920061  | -1.16637 |
| H | -3.611639 | 2.773815  | -1.84421 |
| C | -2.682326 | 0.967384  | -1.16400 |
| H | -1.865735 | 1.046906  | -1.86625 |



**Table S16:** Dipole moments of motors **1-5** calculated at B3LYP/cc-pVDZ level in the unit of Debye for **a** and **b** configurations respectively.

| motors   | <b>a</b> | <b>b</b> |
|----------|----------|----------|
| <b>1</b> | 1.892    | 1.673    |
| <b>2</b> | 1.459    | 1.377    |
| <b>3</b> | 1.654    | 1.650    |
| <b>4</b> | 1.914    | 1.583    |
| <b>5</b> | 0.550    | 0.401    |
